1 Running Head:  **$R^2$ s for Correlated Data**

2

3  **$R^2$ s for Correlated Data: Phylogenetic Models, LMMs, and GLMMs**

4

5 Anthony R. Ives, Department of Integrative Biology, UW-Madison, Madison, WI 53706

6 [arives@wisc.edu](mailto:arives@wisc.edu)

7

8 **Abstract**

9 Many researchers want to report an  $R^2$  to measure the variance explained by a model.  
10 When the model includes correlation among data, such as phylogenetic models and mixed  
11 models, defining an  $R^2$  faces two conceptual problems. (i) It is unclear how to measure the  
12 variance explained by predictor (independent) variables when the model contains covariances.  
13 (ii) Researchers may want the  $R^2$  to include the variance explained by the covariances by asking  
14 questions such as “How much of the variance is explained by phylogeny?” Here, I investigate  
15 three  $R^2$ s for phylogenetic and mixed models. A least-squares  $R^2_{ls}$  is an extension of the ordinary  
16 least-squares  $R^2$  that weights residuals by variances and covariances estimated by the model; it is  
17 closely related to  $R^2_{glmm}$  proposed by Nakagawa & Schielzeth (2013). The conditional  
18 expectation  $R^2_{ce}$  is based on "predicting" each residual from the remaining residuals of the fitted  
19 model. The likelihood ratio  $R^2_{lr}$  was first used by Cragg & Uhler (1970) for logistic regression,  
20 and here is used with the standardization proposed by Nagelkerke (1991). These three  $R^2$ s are  
21 formulated as partial  $R^2$ s, making it possible to compare the contributions of mean components  
22 (regression coefficients in phylogenetic models and fixed effects in mixed models) and variance  
23 components (phylogenetic correlations and random effects) to the fit of models. The properties

24 of the  $R^2$ s for phylogenetic models were assessed using simulations for continuous and binary  
25 response data (phylogenetic generalized least squares and phylogenetic logistic regression).  
26 Because the  $R^2$ s are designed broadly for any model for correlated data, the  $R^2$ s were also  
27 compared for LMMs and GLMMs.  $R^2_{ls}$ ,  $R^2_{ce}$ , and  $R^2_{lr}$  all have good performance, and each has  
28 advantages and disadvantages for different applications. These  $R^2$ s are computed in the R  
29 package rr2 (<https://github.com/arives/rr2>). [Binomial regression, coefficient of determination,  
30 non-independent residuals, phylogenetic model, pseudo-likelihood]

31

32

## INTRODUCTION

33

34

35

36

37

38

39

40

41

42

43

44

45

Researchers often want to calculate a coefficient of determination, an  $R^2$ , to give a measure of the amount of variance in their data explained by a statistical model. For ordinary least-squares models (OLS), such as regression and ANOVA, the  $R^2$  is simple to calculate and interpret. Many types of models, however, assume that the errors among response variables are correlated. Phylogenetic generalized least squares models (PGLS) allow the possibility of phylogenetically related species being more similar to each other, leading to phylogenetic correlations in the errors. PGLS models are structurally similar to linear mixed models (LMMs) that include random effects to account for correlations in the residual variation; for example, LMMs can account for correlation between residuals of experimental replicates within the same block. The situation is more complex for models for discrete response variables, such as phylogenetic logistic regression models (PLOG) and generalized linear mixed models (GLMMs). For models of discrete distributions, even perfectly fitting models have residual variation due to the discreteness of the data, and this complicates the interpretation of an  $R^2$ .

46 Correlated errors in statistical models cause two issues for defining an  $R^2$ . The first  
47 involves assessing the goodness-of-fit of predictor variables (fixed effects) in terms of the  
48 explained variance. For standard OLS models, the errors are assumed to be identical and  
49 independently distributed, and therefore the variance in the residuals can be calculated directly to  
50 give the total variance that is not explained by the model. In models for correlated data, however,  
51 the errors are not independently distributed. Therefore, to calculate the "unexplained variance"  
52 given by the residuals, it is necessary to deal with the covariances among errors; applying the  
53 OLS  $R^2$  to estimates from a model with covariances among errors gives values that are bounded  
54 below by  $-\infty$  rather than zero (Judge *et al.* 1985 p. 32).

55 The second issue for defining an  $R^2$  involves assessing the goodness-of-fit of the  
56 covariances (random effects) estimated in the model. For phylogenetic models, this is embodied  
57 by the question "How much of the data is explained by phylogeny?" The difficulty is that a  
58 phylogenetic model can be used to estimate the strength of phylogenetic signal (covariances) in  
59 the errors, but the phylogenetic signal does not directly lead to predictions of the fitted data.  
60 Desdevises *et al.* (2003) propose an  $R^2$  in which a phylogeny is decomposed into principle  
61 components, and the principle components are used as predictor variables in a set of regressions;  
62 however, it is not clear how the resulting  $R^2$  maps back to the statistical fit of a model and hence  
63 the statistical confidence in its results. An  $R^2$  should ideally be tightly coupled to the fitted model  
64 and use this fit to quantify how much of the data are "explained" by the phylogeny.

65 Here, I assess three  $R^2$ s for models that specify non-zero covariances among errors.  
66 Although the definitions of  $R^2$ s are broad enough to encompass any model specifying an error  
67 covariance matrix, I will focus on application to phylogenetic models for continuous (PGLS) and  
68 binary (PLOG) data. In addition, I will compare the properties of the  $R^2$ s applied to phylogenetic

69 and mixed models, which makes it possible to explore the  $R^2$ s in detail. This comparison also  
70 validates the  $R^2$ s as viable measures of goodness-of-fit for to a broad class of models. This is  
71 important, because  $R^2$ s should make it possible to assess and compare as wide a range of models  
72 as possible (Kvalseth 1985).

73 The general form of the investigated models is

$$74 \quad Y_i \sim \mathcal{F}(\mu_i)$$

$$75 \quad g(\mu_i) = \beta_0 + \beta_1 x_i + e_i$$

$$76 \quad e \sim \text{Gaussian}(\mathbf{0}, \sigma^2 \mathbf{\Sigma}(\theta)) \quad (1)$$

77 where data  $Y_i$  ( $i = 1, \dots, n$ ) are distributed by a member  $\mathcal{F}$  of the exponential family of  
78 distributions (McCullagh & Nelder 1989). The parameter  $\mu_i$  of distribution  $\mathcal{F}$  is itself a random  
79 variable, and applying the link function  $g()$  to  $\mu_i$  gives a linear equation in terms of the predictor  
80 variable  $x_i$  and an error term  $e_i$ . The error term  $e_i$  has a multivariate Gaussian distribution with  
81 means 0 and covariance matrix  $\sigma^2 \mathbf{\Sigma}(\theta)$  that may depend on a parameter  $\theta$ . When the link  
82 function  $g()$  is the identity function, then equation (1) becomes a linear model (e.g., PGLS or  
83 LMM). PLOG can be modeled as a phylogenetic GLMM (PGLMM) in which  $Y_i$  has outcomes 0  
84 and 1, and the link function  $g()$  is logit (Ives & Helmus 2011; Ives & Garland 2014; Hadfield  
85 2015). Note that other approaches to phylogenetic logistic regression (Ives & Garland 2010; Ho  
86 & Ane 2014) are not structured as PGLMMs, although calculating one of the three  $R^2$ s is still  
87 possible. Although equation (1) is written for only a single predictor variable  $x_i$  and parameter  $\theta$   
88 (a single random effect in a GLMM), all of the results presented below extend in the obvious  
89 way to multiple variables  $x_i$  and parameters  $\theta$ .

90           The covariances in the residual errors are contained within  $\sigma^2 \Sigma(\theta)$ . In phylogenetic  
91 models, the structure of  $\sigma^2 \Sigma(\theta)$  is typically generated under a specific model of evolution  
92 (Martins & Hansen 1997b; Lavin *et al.* 2008). For example, in a PGLS using Pagel's  $\lambda$  branch-  
93 length transform (Pagel 1997; Housworth, Martins & Lynch 2004),  $\Sigma(\lambda)$  is the sum of two  
94 matrices,  $\Sigma(\lambda) = \lambda \Sigma_{\text{BM}} + (1-\lambda) \mathbf{I}$ , where  $\Sigma_{\text{BM}}$  is the covariance matrix derived under the  
95 assumption of Brownian motion (BM) evolution (Felsenstein 1985; Grafen 1989), and  $\mathbf{I}$  is the  
96 identity matrix. If  $\lambda=1$ , then the covariances between errors given by BM are proportional to the  
97 distance between two tips and their most common ancestor on the phylogenetic tree. If  $\lambda=0$ , the  
98 errors are uncorrelated, and  $0 < \lambda < 1$  gives intermediate levels of phylogenetic signal. The effect  
99 of  $\lambda$  on the covariances among errors can be depicted by adding tip branches to the BM  
100 phylogenetic tree that are scaled to make up a proportion  $\lambda$  of the base-to-tip distance (Fig. 1).

101           The similarity between PGLS and LMMs can be seen by depicting the LMM as a tree  
102 with branch lengths giving the strength of covariances among errors (Fig. 1). For a model with a  
103 single random effect  $b$ , the covariance matrix is  $\Sigma(\sigma_b^2) = \sigma_b^2 \Sigma_b + \mathbf{I}$  where  $\Sigma_b$  is a block-diagonal  
104 matrix whose values are 1 for each row  $i$  and column  $j$  corresponding to the same level (block) of  
105 the random effect (Gelman & Hill 2007). The greater the variance of the random effect  $\sigma_b^2$ , the  
106 greater the covariances among errors within the same level, and the smaller the relative  
107 contribution of the residual errors given by the length of the tips of the tree. For comparison with  
108 LMMs, GLMMs can also be depicted as a tree, but rather than the residual errors at the tips of  
109 the tree having length 1, for models of discrete data the error variance depends on the  
110 unavoidable differences between the observation (0 or 1 for binary data) and probability of the  
111 observation (taking any value between 0 and 1). The lengths of these variances  $\sigma_w^2$  depend on  
112 the probability of the observation. I am showing the variances  $\sigma_w^2$  only for illustrating the

113 similarities between LMM and GLMM models, and by extension PGLS and PLOG models. In  
114 some methods for implementing GLMMs (Schall 1991; Breslow & Clayton 1993),  $\sigma_w^2$  (the  
115 inverses of the GLM weights; McCullagh & Nelder 1989) are used in the fitting algorithms; in  
116 other methods, for example those in the R package 'lme4' (Bates *et al.* 2014), they are not used,  
117 although they can nonetheless be extracted from fitted models.

118         The three  $R^2$ s presented here partition the “explained” and “unexplained” variances for  
119 models with correlated errors such as those depicted in figure 1. Because models can contain  
120 multiple parameters, the  $R^2$ s compare a full model with a reduced model in which one or more of  
121 the parameters are removed; thus, they are partial  $R^2$ s that give the explained variance by the  
122 components that differ between full and reduced models. The total  $R^2$ s are obtained by selecting  
123 the reduced model in which there is only an intercept and residuals are independent. Defining  
124 partial  $R^2$ s has the advantage of being able to ask about the contribution of a single or subset of  
125 components to the fit of a model. This makes it possible to exclude coefficients in a model that  
126 are not of explicit interest; for example, many phylogenetic models for species traits include  
127 body size as one of the predictor variables to factor out body size, and partial  $R^2$ s make it  
128 possible to assess the goodness-of-fit for the remaining predictor variables. By comparing a  
129 model with a phylogeny to a model without, partial  $R^2$ s also make it possible to answer the  
130 question "How much of the data is explained by phylogeny?"

131          $R^2$ s can be assessed on multiple grounds (Kvalseth 1985), and here I consider three. First,  
132 does the  $R^2$  give a good measure of fit of a model to data? To serve as a basis for assessment, I  
133 use the log-likelihood ratio (LLR) of the full and reduced models. The LLR approaches a  $\chi^2$   
134 distribution for large samples and is therefore used for hypothesis tests of full versus reduce  
135 models (Judge *et al.* 1985). Also, the LLR is linearly related to the AIC and other measures used

136 for model selection (Burnham & Anderson 2002). Therefore, the LLR is a natural choice to  
137 assess  $R^2$ s: a good  $R^2$  should be monotonically related to the LLR. Second, can the  $R^2$  separate  
138 the contribution of different components of the model to the overall model fit? For the simple  
139 case of equation (1) in which there is only a single regression coefficient ( $\beta_1$ ) and a single  
140 variance parameter ( $\theta$ ), I ask whether the  $R^2$ s can distinguish between the two in their  
141 contributions to the fit of the model. Third, does the  $R^2$  give similar values when applied to data  
142 generated by the same statistical process? If the values of  $R^2$  when applied to data generated from  
143 the same statistical process are all similar, then the  $R^2$  gives a precise measure of goodness-of-fit.

144

145

#### MATERIALS AND METHODS

146

147

148

149

150

151

152

153

154

155

156

157

158

There is an extensive literature on  $R^2$ s for GLMs and LMMs, and a growing literature for  
GLMMs (Buse 1973; Cameron & Windmeijer 1996; Cameron & Windmeijer 1997; Kenward &  
Roger 1997; Menard 2000; Xu 2003; Kramer 2005; Edwards *et al.* 2008; Liu, Zheng & Shen  
2008; Orelie & Edwards 2008; Nakagawa & Schielzeth 2013; Jaeger *et al.* 2017), and this  
literature forms the basis for the  $R^2$ s that can be applied to phylogenetic models. The three  $R^2$ s  
take three different approaches to defining "explained variance", the same general approaches  
considered for LMMs by Xu (2003).  $R^2_{ls}$  is based on the variance of the residuals in a way that  
explicitly incorporates their covariances. For models with discrete data,  $R^2_{ls}$  is defined to closely  
match  $R^2_{glmm}$  presented by Nakagawa & Schielzeth (2013).  $R^2_{ce}$  is based on the difference  
between the observed data and model predictions (Kvalseth 1985), where the predictions use  
information from the covariances among errors.  $R^2_{lr}$  is based upon the information that is gained  
by adding parameters (regression parameters or covariance terms); it uses the likelihood ratio of  
full to reduced models as was first proposed for logistic regression (Cragg & Uhler 1970;

159 Maddala 1983; Cox & Snell 1989). For ordinary linear models without correlated errors, these  
160 three  $R^2$ s are identical to the OLS  $R^2$ , but they differ for models with correlated errors.

161 Here I give a heuristic explanation for the  $R^2$ s, and Appendix 1 gives details about their  
162 implementation. The starting point in the derivations of the three  $R^2$ s is the standard  $R^2$  for  
163 continuous data (Buse 1973; Judge *et al.* 1985),

$$164 \quad R^2 = 1 - \frac{\text{mSE}_f(\hat{\theta}_f)}{\text{mSE}_r(\hat{\theta}_r)} \quad (2)$$

165 where  $\text{mSE}_f$  is the mean squared errors for the full model, and  $\text{mSE}_r$  is for the reduced model.

166 For the unadjusted  $R^2$ , the mSEs are the mean SEs without correcting for degrees of freedom, so

167 I have used the abbreviation mSE rather than the normal MSE, the mean squared errors corrected

168 for degrees of freedom. Both full and reduced models may contain parameters in vectors

169  $\theta_f$  and  $\theta_r$ , that involve the variances and covariances among samples which are estimated when

170 the model is fit; for calculating the mSE, these parameters are assumed to be fixed. For a

171 generalized least-squares model (Judge *et al.* 1985),

$$172 \quad \text{mSE}(\hat{\theta}) = \frac{1}{n} (\mathbf{Y} - \mathbf{X}\hat{\beta})' \mathbf{V}(\hat{\theta})^{-1} (\mathbf{Y} - \mathbf{X}\hat{\beta}) \quad (3)$$

173 where  $\mathbf{Y}$  is the  $n \times 1$  vector of response values  $Y_i$ ,  $\mathbf{X}$  is the  $n \times p$  matrix for  $p$  predictor variables

174 (including the intercept),  $\hat{\beta}$  is the  $1 \times p$  vector of estimated regression coefficients (fixed effects),

175 and  $\mathbf{V}(\hat{\theta})^{-1}$  is the inverse of the  $n \times n$  matrix  $\mathbf{V}(\theta) = \sigma^2 \mathbf{\Sigma}(\theta)$  that contains the variances and

176 covariances of the errors. The mSE for OLS models is the special case in which  $\mathbf{\Sigma}(\theta) = \mathbf{I}$ , which

177 gives the standard  $R^2$ .

178 The key issue in defining  $R^2$ s is the scaling of  $\mathbf{V}(\theta) = \sigma^2 \mathbf{\Sigma}(\theta)$ . Setting  $\mathbf{V}(\theta) = \mathbf{\Sigma}(\theta)$  in

179 equation (3), the mSE gives the maximum likelihood estimate of the variance term  $\sigma^2$  from



180 equation (1). However,  $\Sigma(\theta)$  can be rescaled by a constant without changing the fit of the  
181 statistical model; the only effect of multiplying  $\Sigma(\theta)$  by a constant is to change the value of  $\sigma^2$  by  
182  $1/\text{constant}$ . This would not be an issue if the scaling were the same for full and reduced models,  
183 because the scaling would cancel out when dividing  $\text{mSE}_f$  by  $\text{mSE}_r$ . However, it will generally  
184 be the case that  $\Sigma(\hat{\theta}_f) \neq \Sigma(\hat{\theta}_r)$ ; for example, even for LMMs that include the same random  
185 effects,  $\Sigma(\hat{\theta}_f) \neq \Sigma(\hat{\theta}_r)$  if removing fixed effects from the full model changes the estimated  
186 variances of the random effects in the reduce model. Therefore, the scaling is not removed by  
187 dividing  $\text{mSE}_f$  by  $\text{mSE}_r$ . Because the scaling determines the estimate of  $\sigma^2$ , it affects the  $R^2$ . The  
188 three  $R^2$ s presented below differ in how they address the issue of scaling  $\Sigma(\theta)$ .

189

190

$$R^2_{ls}$$

191  $R^2_{ls}$  (for least squares) extends equation (2) in a way that closely matches  $R^2$ s that have  
192 been proposed for LMMs and GLMMs (Buse 1973; Xu 2003; Edwards *et al.* 2008; Nakagawa &  
193 Schielzeth 2013; Jaeger *et al.* 2017). For LMMs, a natural scaling of  $\Sigma(\theta)$  is to let  $\Sigma(\theta) = \mathbf{I} +$   
194  $\mathbf{G}(\theta)$  where  $\mathbf{G}(\theta)$  is the block-diagonal matrix containing the variances of the random effects  
195 divided by the residual variance (i.e.,  $\sigma^2_b$  in Fig. 1). With this scaling, the residual variance  $\sigma^2$   
196 estimated from the LMM equals exactly mSE from equation (3). For the total  $R^2$ , the reduced  
197 model contains only the intercept and therefore equals the variance of the data. This means that  
198 the total  $R^2_{ls}$  for LMMs differs slightly from  $R^2_{glmm(c)}$  (Nakagawa & Schielzeth 2013) in which  
199 the variance in the data is estimated from the full model, rather than the actual variance of the  
200 data. Nonetheless, the values of  $R^2_{ls}$  and  $R^2_{glmm(c)}$  will be very close.

201 For phylogenetic models, scaling  $\Sigma(\theta)$  is more complicated. For some common branch-  
202 length transforms in PGLS that are used to measure the strength of phylogenetic signal, such as  
203 the OU transform (Martins & Hansen 1997a; Blomberg, Garland & Ives 2003), the covariance  
204 matrix  $\Sigma(\theta)$  does not separate additively to give terms for the explained versus unexplained  
205 variance. Even though Pagel's  $\lambda$  branch-length transform,  $\Sigma(\lambda) = \lambda\Sigma_{\text{BM}} + (1-\lambda)\mathbf{I}$ , does break  
206 down into the sum of phylogenetic and non-phylogenetic terms, the non-phylogenetic term  $(1-$   
207  $\lambda)\mathbf{I}$  cannot be interpreted as the unexplained variance. This is because, for many data sets, the  
208 estimate of  $\lambda$  will be 1, which is the expectation under the assumption of BM evolution. If this  
209 occurs, this would force an  $R^2$  treating  $(1-\lambda)\mathbf{I}$  as the unexplained variance to be 1, regardless of  
210 the explanatory power of the predictor variances (fixed effects); this property would make the  $R^2$   
211 uninformative. To solve this problem, I propose scaling  $\Sigma(\theta)$  so that the total branch lengths  
212 equal 1; this is equivalent to assuming that the total amount of independent evolution is the same.  
213 For a fitted tree with strong phylogenetic signal, scaling  $\Sigma(\theta)$  to have the total branch lengths  
214 equal to 1 will make the base-to-tip distances greater than a fitted tree with no phylogenetic  
215 signal. Because this scaling increases the diagonal elements in  $\Sigma(\theta)$  for greater phylogenetic  
216 signal, it will reduce the estimates of  $\sigma^2$  and decrease the variance in the residuals that is  
217 unexplained by the model. Although this is only a convention (as opposed to a scaling derived  
218 from theory), the resulting  $R^2_{\text{ls}}$  performs for PGLS models in a similar way as it does for LMMs.

219 For discrete models, it is necessary to account for the variation introduced by discrete  
220 data (Fig. 1). While there are different ways to do this (Appendix 1), an approach that makes  $R^2_{\text{ls}}$   
221 conform to  $R^2_{\text{glmm}(c)}$  for GLMMs (Nakagawa & Schielzeth 2013) is to replace mSE in equation

222 (2) with  $\frac{\sigma_d^2}{\hat{\sigma}_f^2 + \hat{\sigma}_l^2 + \sigma_d^2}$  where  $\sigma_d^2$  gives the distribution-specific variance attributed to the

223 discreteness of the data;  $\sigma_d^2 > 0$  because the predictions from the model are probabilities whereas  
224 the observations are discrete values (0 or 1 for binary data). For binary data  $\sigma_d^2 = \pi^2/3$ . The  
225 variance that  $\sigma_d^2$  measures is at the level of the transformed parameter value (i.e.,  $g(\mu_i)$  in  
226 equation (1)) for which the errors are normally distributed. To scale the variance  $\sigma_d^2$  by the  
227 variances of the data in the transformed space of  $g(\mu_i)$ , it is necessary to divide  $\sigma_d^2$  by the total  
228 variance that is given by the regression coefficients (fixed effects),  $\hat{\sigma}_f^2$ , and the errors,  $\hat{\sigma}_i^2$ . For  
229 GLMMs  $\hat{\sigma}_i^2$  is the estimate of the variance of the random effects. For PGLMMs  $\hat{\sigma}_i^2$  is the  
230 estimate of the variance in the Gaussian error term  $\sigma^2 \Sigma$  in which  $\Sigma$  is scaled to have base-to-tip  
231 branch lengths of 1. Note that in contrast to  $R^2_{glmm(c)}$  (Nakagawa & Schielzeth 2013),  $R^2_{ls}$  is  
232 explicitly defined as a partial  $R^2$ ; this not only makes it possible to assess the contributions of  
233 different components of the model to goodness-of-fit, it also simplifies application and  
234 interpretation of  $R^2_{ls}$  to LMMs and GLMMs with complex random effects, such as random slope  
235 effects (Johnson 2014).

236

237

$$R^2_{ce}$$

238

239

$R^2_{ce}$  (for conditional expectation) is based on the variance in the difference between  
observed and predicted data,  $\frac{1}{n} \sum (Y_i - \hat{Y}_i)^2$ . This approach conceptually comes the closest to

240

241

answer the question of how much variation in the data is explained by the covariances in the  
model. For the case of LMMs, the predicted values  $\hat{Y}_i$  can be taken as the sum of the fixed

242

effects and the estimate of the value of the random effects. For the LMM in figure 1, this

243

corresponds to the estimated value at the polytomy formed at the node shared by all observations

244 within the same level of the random effect. As the number of observations within each level of  
245 the random effect increases,  $R^2_{ce}$  for LMMs converges to  $R^2_{ls}$  because the estimates of the values  
246 of the random effects become more precise.

247 As it does for  $R^2_{ls}$ , PGLS poses a complication for  $R^2_{ce}$ : what is the predicted value  $\hat{Y}_i$ ?

248 To parallel  $R^2_{ce}$  for LMMs,  $\hat{Y}_i$  could be taken as the estimated value at the node immediate below  
249 the tip on the phylogeny containing  $Y_i$ . For phylogenies with some short terminal branch lengths,  
250 however, the estimates for the node underneath  $Y_i$  will be determined largely by the value of  $Y_i$   
251 itself, leading to very high (and uninformative)  $R^2$ s. Therefore, for PGLS I defined  $R^2_{ce}$  using the  
252 estimates  $\hat{Y}_i$  computed by removing the point  $Y_i$  from the data set and then estimating  $\hat{Y}_i$  from  
253 the predictor variables and the remaining data points. Specifically for equation (1), the expected  
254 value of residual  $R_i = Y_i - (\beta_0 + \beta_1 x_i)$  from the remaining residuals  $\mathbf{R}_{[-i]}$  is

$$255 \quad \hat{R}_i = \bar{R} + \mathbf{V}_{[i,-i]} \mathbf{V}_{[-i,-i]}^{-1} (\mathbf{R}_{[-i]} - \bar{R}), \quad (4)$$

256 where  $\bar{R}$  is the GLS mean of the residuals,  $\mathbf{V}_{[i,-i]}$  is row  $i$  of  $\mathbf{V}$  with column  $i$  removed, and  $\mathbf{V}_{[-i,-i]}$   
257 is  $\mathbf{V}$  with row  $i$  and column  $i$  removed (Petersen & Pedersen 2012). The predicted value of  $Y_i$  is  
258 then  $\hat{Y}_i = \beta_0 + \beta_1 x_i + \hat{R}_i$ . Note that this procedure (removing  $Y_i$  before predicting  $\hat{Y}_i$ ) could be  
259 used for LMMs (and other models), although to make  $R^2_{ce}$  conform most closely to the structure  
260 of LMMs, the LMM  $R^2_{ce}$  makes predictions  $\hat{Y}_i$  while keeping  $Y_i$  in.

261 The same approach as used for LMMs can be used for GLMMs and PGLMMs. In these  
262 cases, the variances are calculated for untransformed values of  $Y_i$ , rather than in the Gaussian  
263 space of  $g(\mu_i)$  as was done for  $R^2_{ls}$ . These predicted values are given from the estimation  
264 algorithms for GLMMs by glmer in the R package lme4 (Bates *et al.* 2014) and for PGLMMs by  
265 binaryPGLMM (Ives & Helmus 2011; Ives & Garland 2014) in the R package ape (Paradis &

266 Paradis 2012). Because GLMMs and PGLMMs include the unavoidable variance in  $Y_i - \hat{Y}_i$  due  
267 to the discreteness of the data, the estimates  $\hat{Y}_i$  correspond to those values a distance  $\sigma_w^2$  from  
268 the tips of the tree in figure 1.

269

270

$$R^2_{lr}$$

271  $R^2_{lr}$  (for likelihood ratio) is the application of an  $R^2$  proposed for logistic regression  
272 (Cragg & Uhler 1970; Maddala 1983; Cox & Snell 1989) and generalized by Magee (1990) and  
273 Nagelkerke (1991), and used for LMMs by Kramer (2005).  $R^2_{lr}$  computed for a range of models  
274 in the MuMIn package of R (Barton 2016). For LMMs,  $R^2_{lr}$  differs from  $R^2_{ls}$  only in the scaling  
275 of  $\mathbf{V}(\theta)$ . If  $\mathbf{V}(\theta)$  is scaled so that the determinant  $\det(\mathbf{V}(\theta)) = 1$ , then the maximum log likelihood  
276 is

$$277 \quad \log Lik(\hat{\theta}) = -\frac{n}{2} \left( \log(2\pi \text{mSE}(\hat{\theta})) + 1 \right). \quad (5)$$

278 Substituting into equation (2) then leads to

$$279 \quad R^2_{lr} = 1 - \exp\left(\frac{-2}{n} \left( \log Lik(\hat{\theta}_f) - \log Lik(\hat{\theta}_r) \right)\right). \quad (6)$$

280 This definition of  $R^2_{lr}$  in terms of likelihoods extends immediately to any model fit by maximum  
281 likelihood estimation, including PGLS and GLMM. However, for discrete data equation (6) does  
282 not have a maximum of 1, because the maximum attainable log-likelihood for discrete data is  
283 zero. Therefore, Nagelkerke (1991) and Cameron and Windmeijer (1997) proposed dividing by  
284 the maximum attainable value, which is equation (6) with  $\log Lik(\hat{\theta}_f) = 0$ ; throughout, I have  
285 used this Nagelkerke standardization.



309 Claude & Strimmer 2004). Thus, a different tree was simulated for each dataset. The strength of  
310 phylogenetic signal was varied using Pagel's  $\lambda$  transformation which served as the variance  
311 parameter  $\theta$ . Values of  $x_i$  were simulated under the BM assumption using the rTraitCont function  
312 (Paradis, Claude & Strimmer 2004). The simulated data were fit using penalized maximum  
313 likelihood with the function phylolm assuming a Pagel's lambda transformation in the package  
314 phyloglm in R (Ho & Ane 2014). The PLOG model was similar to the PGLS model, but in  
315 contrast the predictor variable  $x_i$  was assumed to be independently distributed; including  
316 phylogenetic signal in  $x_i$  caused challenges for model fitting for some simulated datasets, making  
317 the simulation studies difficult. Phylogenetic signal in the residuals  $e_i$  was controlled by setting  
318  $\Sigma(\theta) = \theta \Sigma_{\text{BM}}$  so that in the absence of phylogenetic signal ( $\theta = 0$ ) the simulations conformed to  
319 simple logistic regression. To simulate binary data, a logit link function was used in equation (1).

320

### 321 *Simulated examples*

322 I illustrate the three  $R^2$ 's for two simulated examples. The first involves a PGLS model for  
323 two predictor variables and computes the partial  $R^2$ 's for one of them. For example, suppose a  
324 researcher has data on sprint speed in lizards, and the predictor variables are hind leg length and  
325 body size (Bauwens *et al.* 1995). Hind leg length is the variable of interest, while body size is a  
326 covariate, and therefore the interesting  $R^2$  compares the models with and without hind leg length.  
327 I simulated the case of 30 species under BM evolution and compared the cases in which hind leg  
328 length (as a proportion of body size) either did or did not show phylogenetic signal. Specifically,  
329 the model was

$$330 \quad Y = \beta_0 + \beta_1 \log(\text{body size}) + \beta_2 \log(\text{hind leg length}) + e_i$$

$$331 \quad e \sim \text{Gaussian}(\mathbf{0}, \sigma^2 \Sigma_{\text{BM}}) \quad (8)$$

332 where  $\log(\text{body size})$  was selected from a Gaussian distribution with covariance matrix  $\Sigma_{\text{BM}}$ , and  
333  $\log(\text{hind leg length})$  was selected from a Gaussian distribution with covariance matrix either  $\mathbf{I}$  or  
334  $\Sigma_{\text{BM}}$ . The data were fit using phylolm with Pagel's  $\lambda$  transformation.

335 As a second example, I simulated LMMs and binary GLMMs using equation (7), and fit  
336 them not only as LMM and GLMMs, but also as PGLS and PLOG models. The fitting as  
337 phylogenetic models was performed by converting the covariance matrix given by the random  
338 effects in the LMM and GLMM into a phylogenetic tree (Fig. 1) using the vcv2phylo function in  
339 ape (Paradis & Paradis 2012). This simulation allows a direct comparison between the  $R^2$ s  
340 applied to mixed versus phylogenetic models.

341

## 342 RESULTS

343 The  $R^2$ s were assessed according to the three properties: (i) their ability to measure  
344 goodness-of-fit as benchmarked by the LLR of full model and the model with only an intercept,  
345 (ii) whether they can partition sources of variation in the model as partial  $R^2$ s, and (iii) how  
346 precise is their inference about goodness-of-fit. Property (iii) treats the  $R^2$ s as if they were  
347 estimators of goodness-of-fit and asks how variable are the estimates when applied to repeated  
348 simulations from the same model (e.g., ; Cameron & Windmeijer 1996). A more comprehensive  
349 assessment is given in Appendix 2.

350

### 351 *Goodness-of-fit*

352 Figure 2 plots the total  $R^2$ s against the corresponding LLR. All  $R^2$ s were positively  
353 related to the LLR, which is a minimum requirement for an  $R^2$ .  $R^2_{lr}$  shows a monotonic  
354 relationship with LLR, which is necessarily the case due to the definition of  $R^2_{lr}$  (equations (5),



355 (6)). For the remaining  $R^2$ s, values for a given LLR were generally lower for simulations in  
356 which variation was produced only by the fixed effect ( $\beta_1 > 0$ ,  $\theta = 0$ ; Fig. 1, blue circles). This  
357 implies that, relative to the LLR, these  $R^2$ s were attributing less “explained” variance to  
358 regression coefficients (fixed effects) than covariances parameters (phylogeny and random  
359 effects).

360 For the LMM, I included the adjusted  $R^2$ ,  $R^2_{adj}$ , computed from OLS regression by  
361 treating the random effect as a categorical fixed effect.  $R^2_{ls}$  and  $R^2_{adj}$  were almost identical. This  
362 correspondence implies that  $R^2_{ls}$  gives an  $R^2$  that is interpretable in the same way as the standard  
363  $R^2_{adj}$  but generalized to LMMs.

364 All of the  $R^2$ s other than  $R^2_{lr}$  showed greater scatter in their relationships with LLR for  
365 the simulations of binary data (GLMM and PLOG). In part, this is due to the difficulty of  
366 estimating variance parameters  $\theta$  in binomial models. For example, there is more scatter in  $R^2_{lr}$   
367 for GLMM simulations than LMM simulations, even though the criterion for calculating the  $R^2$ s  
368 (the log likelihoods) are the same. The scatter seems particularly large for  $R^2_{ls}$  and  $R^2_{ce}$  applied to  
369 PLOG simulations, although this case requires some technical discussion. For PLOG, the LLR  
370 was obtained from phyloglm using penalized maximum likelihood, whereas  $R^2_{ls}$  and  $R^2_{ce}$  were  
371 estimated from the model fit by binaryPGLMM using the pseudo-likelihood. The phyloglm  
372 estimate of phylogenetic signal,  $\lambda$ , tended to absorb at zero even when the estimate  $\lambda$  from  
373 binaryPGLMM was positive; therefore,  $R^2_{ls}$  and  $R^2_{ce}$  could be positive even when the LLR was  
374 zero. Previous comparison between phyloglm and binaryPGLMM showed that they have similar  
375 performances but do not necessarily give the same conclusions about the presence of  
376 phylogenetic signal for the same dataset (Ives & Garland 2014).

377

378

### *Partitioning sources of variation*

379

The partial  $R^2_{ls}$ ,  $R^2_{ce}$ , and  $R^2_{lr}$  were generally able to partition sources of variation

380

between components of a model, in particular between regression coefficients (fixed effects) and

381

covariance parameters (random effects). Simulations with  $\beta_1 > 0$  and  $\theta = 0$  should have partial

382

$R^2$ s for  $\beta_1$  that are positive and partial  $R^2$ s for  $\theta$  that are zero (blue circles, Fig. 2). Simulations

383

with  $\beta_1 = 0$  and  $\theta > 0$  should have partial  $R^2$ s for  $\beta_1$  that are zero and partial  $R^2$ s for  $\theta$  that are

384

positive (red triangles, Fig. 2). Simulations with  $\beta_1 > 0$  and  $\theta > 0$  should have both partial  $R^2$ s  $> 0$

385

(black x's, Fig. 2). Because the values of  $\beta_1$  and  $\theta$  were the same whether or not the other was

386

zero, the partial  $R^2$ s for  $\beta_1$  should be the same for simulations with  $\theta = 0$  (blue circles) as for

387

simulations with  $\theta > 0$  (black x's), and the partial  $R^2$ s for  $\theta$  should similarly be the same for  $\beta_1 =$

388

0 (red triangles) and  $\beta_1 > 0$ . For continuous data (LMM and PGLS), all three  $R^2$ s had similar

389

performance and similar values of the partial  $R^2$ s (see also Appendix 2). For binary data (GLMM

390

and PLOG), the three  $R^2$ s showed more scatter, which in large part is due to the greater statistical

391

challenge of estimating regression coefficients and variance parameters from discrete data. This

392

is seen, for example, in the GLMM and PLOG simulations with  $\beta_1 > 0$  and  $\theta > 0$  which

393

sometimes gave a partial  $R^2_{lr}$  for  $\theta$  of zero (black x's); these cases occur when the estimate of  $\theta$

394

was zero even though a non-zero value was used in the simulations.

395

396

### *Inference about underlying process*

397

The ability of  $R^2$ s to infer the fit of the statistical process to the model depends on the

398

precision of the estimates of  $R^2$ . Figure 4 plots the mean values of the  $R^2$ s with 66% and 95%

399

inclusion intervals for simulated datasets with sample sizes 40, 60, ..., 160. For LMMs and

400

GLMMs, there were 10 levels of the random effect; datasets were produced by first simulating

401 160 samples (16 replicates at each level) and then randomly removing two replicates at each  
402 level to reduce the sample size in steps of 20. For PGLS and PLOG, each dataset at each sample  
403 size was simulated independently.

404 For LMM simulations,  $R^2_{ls}$ ,  $R^2_{ce}$ , and  $R^2_{adj}$  showed similar patterns (Fig. 4), reflecting the  
405 fact that they give very similar values (Fig. 2, Appendix 2). Mean values did not change with  
406 sample size, and there was only moderate increase in variability among simulations with  
407 decreasing sample size. In contrast, mean values of  $R^2_{lr}$  decreased with decreasing sample size.  
408 This probably reflects the information that is lost when estimating the model parameters. In  
409 contrast to LMM simulations, the PGLS simulations showed less change in the means of  $R^2_{lr}$  and  
410  $R^2_{ce}$  with sample size, presumably because there were more covariances among samples (i.e., the  
411 covariance matrix had more non-zero elements) than in the LMM with few replicates per level.

412 For the GLMM, both  $R^2_{ls}$  and  $R^2_{ce}$  had somewhat higher variances (less precision) than  
413  $R^2_{lr}$ . The greater variation in values of  $R^2_{ls}$  and  $R^2_{ce}$  compared to  $R^2_{lr}$  may occur because  $R^2_{ls}$  and  
414  $R^2_{ce}$  depend on estimates from the models (random effects for  $R^2_{ls}$  and fitted values for  $R^2_{ce}$ )  
415 whereas  $R^2_{lr}$  depends on likelihoods. Thus,  $R^2_{ls}$  and  $R^2_{ce}$  are compromised when the estimates are  
416 poor, as is particularly the case when sample sizes are small. For PLOG, the variances in  $R^2_{ls}$  and  
417  $R^2_{ce}$  were similar to  $R^2_{lr}$  (Fig. 4). This is likely because estimates of phylogenetic signal ( $\lambda = \theta$ )  
418 were well-bounded, in contrast to the variance in random effects in the GLMMs.

419

#### 420 *Simulated examples*

421 In the simulated example of sprint speed regressed on log body mass ( $x_1$ ) and log hind  
422 limb length ( $x_2$ ) (equation (8)), whether or not log hind limb length showed phylogenetic signal  
423 had a large effect on the partial  $R^2$ 's for the effect of log hind limb length (Table 1). In the fitted

424 PGLS models for both datasets, the parameter estimates and log likelihoods were similar, and the  
425 only indication that phylogenetic signal in hind limb length affected the fit of the model was the  
426  $p$ -value for the regression coefficient for hind limb length ( $P = 0.012$  when  $x_2$  had phylogenetic  
427 signal and  $P \ll 0.001$  when it did not). The partial  $R^2_{ls}$ ,  $R^2_{ce}$ , and  $R^2_{lr}$  for hind leg length were  
428 0.21-0.23 when hind leg length had phylogenetic signal, and 0.71-0.89 when it did not. In  
429 contrast, the partial  $R^2$ s for phylogenetic signal (reduced model with  $\lambda = 0$ ) and the total  $R^2$ s  
430 (reduced model with  $x_1 = x_2 = \lambda = 0$ ) did not differ much between simulations. The partial  $R^2$ s for  
431 hind limb length depended upon the phylogenetic signal in hind limb length because when there  
432 is phylogenetic signal and hind limb length is removed from the model, much of the information  
433 is recaptured in the phylogenetic signal of the residual variation. This example illustrates the  
434 value of having partial  $R^2$ s that can assess the role of predictor variables separately from other  
435 variables like body size that are not of specific interest.

436 In the second example (Table 2), a LMM and a GLMM were simulated and then the data  
437 were fit using LMM and GLMM, and also PGLS and PLOG by converting the covariance matrix  
438 given by the random effects into a phylogeny (Fig. 1).  $R^2_{ls}$ ,  $R^2_{lr}$ , and  $R^2_{ce}$  were computed for the  
439 total model, as well as partial  $R^2$ s for the fixed effect  $x$  and the random effect  $\theta$ . As expected,  $R^2_{lr}$   
440 was the same for mixed and phylogenetic models. All values for  $R^2_{ce}$  were also close between  
441 mixed and phylogenetic models. For the LMM simulation,  $R^2_{ls}$  calculated for the LMM model  
442 was very close to both  $R^2_{ce}$  and the  $R^2_{ols}$  computed by treating the random effect as a categorical  
443 fixed effect. However, the values of  $R^2_{ls}$  calculated from PGLS were lower. This occurred  
444 because the scaling of the covariance matrix  $\Sigma$  for LMM and PGLS is different; for LMM  $R^2_{ls}$   
445 scales  $\Sigma$  so that the residual error corresponds to 1, whereas for PGLS  $R^2_{ls}$  scales  $\Sigma$  so that the  
446 total branch lengths equal 1. Although this gives different values of  $R^2_{ls}$  for LMM and PGLS, it

447 avoids forcing  $R^2_{ls}$  to equal 1 when the residual error matches its expectation under BM  
448 evolution. For the GLMM simulation,  $R^2_{ls}$  from the fitted GLMM is higher than  $R^2_{ls}$  from the  
449 fitted PLOG, although  $R^2_{ls}$  for both models are higher than  $R^2_{lr}$  and  $R^2_{ce}$ .

450

451 DISCUSSION

452  $R^2_{ls}$ ,  $R^2_{ce}$ , and  $R^2_{lr}$  are presented here with focus on phylogenetic models, although they  
453 are broadly applicable to models with correlated errors. Below, I first address their specific  
454 application to phylogenetic models using mixed models as a reference, and then give general  
455 recommendations.

456

457 *Applications to LMM, PGLS, GLMM, and PLOG*

458 For both continuous data (LMM and PGLS) and discrete data (GLMM and PLOG), all  
459  $R^2$ s had good performance. For the simple model with a single regression coefficient  $\beta_1$  and  
460 single covariance parameter  $\theta$  (equation (7)), all  $R^2$ s were reasonable measures of goodness-of-fit,  
461 as assessed against the log likelihood ratio between full and reduced models (Fig. 2).  
462 Nonetheless,  $R^2_{ls}$  and  $R^2_{ce}$  gave lower partial  $R^2$  values for the regression coefficient  $\beta_1$  relative to  
463 the partial  $R^2$  values for the covariance parameter  $\theta$  in comparison to  $R^2_{lr}$  and the log likelihood  
464 ratio, LLR (Fig. 2). Also, although all three  $R^2$ s gave very similar values for the same dataset  
465 with continuous data, the values differed more for discrete data fit with either GLMM or PLOG  
466 (Fig. 2 and Appendix 2). This is reflected in general by the decreased precision of the  $R^2$ s applied  
467 to discrete data, as measured by the variation in values when fit to data simulated under the same  
468 parameter values (Fig. 4). All  $R^2$ s were capable of identifying whether  $\beta_1$  or  $\theta$  was responsible  
469 for the fit of the model to the data as determined by the partial  $R^2$ s; when  $\beta_1$  or  $\theta$  were zero in the

470 simulations, the partial  $R^2$ s for  $\beta_1$  or  $\theta$ , respectively, were low (Fig. 3). However, the partial  $R^2$ s  
471 for GLMM and PLOG tended to be more variable and less conclusive than for LMM and PGLS  
472 (Fig. 3). Finally,  $R^2_{lr}$  decreased as sample sizes decreased especially for LMMs but also for  
473 GLMMs (Fig. 4). This is an understandable consequence of the loss of information to separate  
474 full and reduced models when there are fewer data. Nonetheless, it is an undesirable property,  
475 just as the change in the unadjusted OLS  $R^2$  is undesirable.

476 The poorer performance of all three  $R^2$ s for GLMM and PLOG relative to LMM and  
477 PGLS in terms of partitioning sources of variation (Fig. 3) and precision (Fig. 4) is due to the  
478 greater challenges of fitting discrete data. This will affect the  $R^2$ s differently if they are  
479 differently sensitive to the fitting.  $R^2_{ls}$  is calculated from fitted variances in a model;  $R^2_{ce}$  is  
480 calculated from the fitted values of  $Y_i$ ; and  $R^2_{lr}$  is calculated from the likelihood. Therefore, the  
481 three  $R^2$ s will be sensitive to the precision with which each of these attributes is estimated. For  
482 GLMMs, the precision of  $R^2_{lr}$  was slightly greater than the other two  $R^2$ s, although this did not  
483 appear to be the case for PLOG.

484 Although it is hard to argue in favor of one  $R^2$  over the others on the basis of their  
485 performance in the simulations,  $R^2_{ls}$  has the advantage of producing  $R^2_{glmm(c)}$  (Nakagawa &  
486 Schielzeth 2013) as a special case when applied to LMMs and GLMMs. Furthermore, because  
487  $R^2_{ls}$  (like the other  $R^2$ s) is defined as a partial  $R^2$ , it makes application to LMMs and GLMMs  
488 more flexible and general, allowing subsets of fixed and random effects to be analyzed, and also  
489 more-complex structures like random slopes (Johnson 2014). Nonetheless, a partial  $R^2_{glmm(c)}$   
490 comparable to  $R^2_{ls}$  can easily be defined as

491 
$$R^2_{glmm.partial} = 1 - \frac{1 - R^2_{glmm(c).full}}{1 - R^2_{glmm(c).reduced}} \quad (9)$$

492 Although the relationship between  $R^2_{ls}$  and  $R^2_{glmm(c)}$  might argue in favor of  $R^2_{ls}$  over  $R^2_{ce}$  and  $R^2_{lr}$ ,  
493 when applied to data simulated from LMM and GLMM,  $R^2_{ls}$  values calculated from fitted LMM  
494 and GLMM were different from the values calculated from PGLS and PLOG fitted to the same  
495 data (Table 2). This highlights a weakness of  $R^2_{ls}$ : a decision has to be made about how to scale  
496 the covariance matrix  $\Sigma$  depending on the fitted model, and the resulting values of  $R^2_{ls}$  will  
497 depend on this decision.

498

### 499 *Recommendations*

500 An ideal  $R^2$  would make it possible to compare among different models and among  
501 different methods used to fit the same model (Kvalseth 1985 properties of a good R2 #4 and #5).  
502  $R^2_{ls}$  and  $R^2_{ce}$  can be used for any model and fitting method that estimates the covariance matrix  
503 ( $R^2_{ls}$ ) and/or fitted values ( $R^2_{ce}$ ); for example, they could be used to compare LMMs fit with ML  
504 vs. REML, or binary phylogenetic models fit with ML (e.g., phyloglm; Ho & Ane 2014) or  
505 quasi-likelihood (e.g., binaryPGLMM; Ives & Garland 2014). Nonetheless,  $R^2_{ls}$  and  $R^2_{ce}$  have a  
506 disadvantage in terms of generality. For  $R^2_{ls}$  a decision must be made about how to scale the  
507 covariance matrix  $\mathbf{V}(\theta)$  (equation (3)), and for  $R^2_{ce}$  a decision has to be made about how values  
508 of  $Y_i$  are predicted. The conventions I used for LMMs and PGLS differed. In contrast,  $R^2_{lr}$  is  
509 restricted to models that are fit with ML estimation; however, if ML is used for fitting, then  
510 values of  $R^2_{lr}$  can be compared across different types of models. This applies to any type of data  
511 and model fit with ML estimation.

512 An ideal  $R^2$  should also be intuitive (Kvalseth 1985 property #1). However, intuitive is in  
513 the eye of the beholder.  $R^2_{ls}$  is the most similar to the OLS  $R^2$ , which grounds  $R^2_{ls}$  in the familiar  
514 and intuitive OLS framework.  $R^2_{ce}$  predicts the data from covariances estimated in the model,

515 and therefore could be viewed as the most intuitive way to relate the variance explained by  
516 regression coefficients (fixed effects) to that explained by variance parameters (random effects).  
517  $R^2_{lr}$  is also related to the OLS  $R^2$ : in LMMs and PGLS,  $R^2_{lr}$  only differs from  $R^2_{ls}$  by the way in  
518 which the covariance matrix  $\mathbf{V}(\theta)$  (equation (3)) is scaled, and this provides a link between  $R^2_{lr}$   
519 and the OLS  $R^2$  through  $R^2_{ls}$ . This said, however, I suspect that different researchers would rank  
520 the intuitiveness of  $R^2_{ls}$ ,  $R^2_{ce}$ , and  $R^2_{lr}$  differently.

521  $R^2$ s are often used as "summary statistics" to describe the fit of a model to data in a way  
522 that does not involve statistical inference about the underlying stochastic process that generated  
523 the data: "How does the model fit these data?" rather than "How much does the model infer  
524 about the process that generated the data?" Should  $R^2$ s be judged as a summary statistic? I think  
525 not. All the  $R^2$ s showed high variation among simulations of the same model with the same  
526 parameters, especially when sample sizes were small (Fig. 4). This means that how the model fits  
527 a specific dataset involves a lot of chance, and hence one should not get too excited about a high  
528  $R^2$ , or too discouraged about a low one.  $R^2$ s are best treated as inferential statistics, that is, as  
529 functions of a data-generating process that are themselves random variables (Cameron &  
530 Windmeijer 1996; Nakagawa & Schielzeth 2013). As an inferential statistic,  $R^2_{lr}$  most directly  
531 ties to hypothesis testing between full and reduce models using a likelihood ratio test. For me,  
532 this tips the balance to favor  $R^2_{lr}$  over the others.

533

534

#### ACKNOWLEDGMENTS

535 I thank Ted Garland, Daijiang Li, Shinishi Nakagawa, Eric Pedersen, and Joe Phillips for  
536 wonderfully insightful comments that helped to clarify this article.

537



538  
539  
540  
541  
542  
543  
544  
545  
546  
547  
548  
549  
550  
551  
552  
553  
554  
555  
556  
557  
558  
559  
560  
561  
562  
563  
564  
565  
566  
567  
568  
569  
570  
571  
572  
573  
574  
575  
576  
577  
578

## FUNDING

Financial support came from the US National Science Foundation, DEB-LTREB-1052160 and DEB-1240804.

## REFERENCES

- Barton, K. (2016) MuMIn: Multi-model inference.
- Bates, D., Maechler, M., Bolker, B. & Walker, S. (2014) lme4: Linear mixed-effects models using Eigen and S4.
- Bauwens, D., Garland, T., Castilla, A.M. & Vandamme, R. (1995) Evolution of Sprint Speed in Lacertid Lizards - Morphological, Physiological, and Behavioral Covariation. *Evolution*, **49**, 848-863.
- Blomberg, S.P., Garland, T., Jr. & Ives, A.R. (2003) Testing for phylogenetic signal in comparative data: behavioral traits are more labile. *Evolution*, **57**, 717-745.
- Breslow, N.E. & Clayton, D.G. (1993) Approximate inference in generalized linear mixed models. *Journal of the American Statistical Association*, **88**, 9-25.
- Burnham, K.T. & Anderson, D.R. (2002) *Model selection and inference: a practical information-theoretic approach*, Second edn. Springer, New York, New York.
- Buse, A. (1973) Goodness of fit in generalized least-squares estimation. *American Statistician*, **27**, 106-108.
- Cameron, A.C. & Windmeijer, F.A.G. (1996) R-Squared measures for count data regression models with applications to health-care utilization. *Journal of Business & Economic Statistics*, **14**, 209-220.
- Cameron, A.C. & Windmeijer, F.A.G. (1997) An R-squared measure of goodness of fit for some common nonlinear regression models. *Journal of Econometrics*, **77**, 329-342.
- Cox, D.R. & Snell, E.J. (1989) *The analysis of binary data*. Chapman and Hall, London, UK.
- Cragg, J.G. & Uhler, R.S. (1970) Demand for automobiles. *Canadian Journal of Economics*, **3**, 386-406.
- Desdevises, Y., Legendre, P., Azouzi, L. & Morand, S. (2003) Quantifying phylogenetically structured environmental variation. *Evolution*, **57**, 2647-2652.
- Edwards, L.J., Muller, K.E., Wolfinger, R.D., Qaqish, B.F. & Schabenberger, O. (2008) An R-2 statistic for fixed effects in the linear mixed model. *Statistics in Medicine*, **27**, 6137-6157.
- Felsenstein, J. (1985) Phylogenies and the comparative method. *American Naturalist*, **125**, 1-15.
- Gelman, A. & Hill, J. (2007) *Data analysis using regression and multilevel/hierarchical models*. Cambridge University Press, New York, NY.
- Grafen, A. (1989) The phylogenetic regression. *Transactions of the Royal Society of London B, Biological Sciences*, **326**, 119-157.
- Hadfield, J.D. (2015) Increasing the efficiency of MCMC for hierarchical phylogenetic models of categorical traits using reduced mixed models. *Methods in Ecology and Evolution*, **6**, 706-714.
- Ho, L.S.T. & Ane, C. (2014) A linear-time algorithm for Gaussian and non-Gaussian trait evolution models. *Systematic Biology*, **63**, 397-408.

- 579 Housworth, E.A., Martins, E.P. & Lynch, M. (2004) The phylogenetic mixed model. *American*  
580 *Naturalist*, **163**, 84-96.
- 581 Ives, A.R. & Garland, T. (2010) Phylogenetic logistic regression for binary dependent variables.  
582 *Systematic Biology*, **59**, 9-26.
- 583 Ives, A.R. & Garland, T., Jr. (2014) Phylogenetic regression for binary dependent variables.  
584 *Modern Phylogenetic Comparative Methods and Their Application in Evolutionary*  
585 *Biology* (ed. L.Z. Garamszegi), pp. 231-261. Springer-Verlag, Berlin Heidelberg.
- 586 Ives, A.R. & Helmus, M.R. (2011) Generalized linear mixed models for phylogenetic analyses of  
587 community structure. *Ecological Monographs*, **81**, 511-525.
- 588 Jaeger, B.C., Edwards, L.J., Das, K. & Sen, P.K. (2017) An R-2 statistic for fixed effects in the  
589 generalized linear mixed model. *Journal of Applied Statistics*, **44**, 1086-1105.
- 590 Johnson, P.C.D. (2014) Extension of Nakagawa & Schielzeth's R-GLMM(2) to random slopes  
591 models. *Methods in Ecology and Evolution*, **5**, 944-946.
- 592 Judge, G.G., Griffiths, W.E., Hill, R.C., Lutkepohl, H. & Lee, T.-C. (1985) *The theory and*  
593 *practice of econometrics*, Second edn. John Wiley and Sons, New York.
- 594 Kenward, M.G. & Roger, J.H. (1997) Small sample inference for fixed effects from restricted  
595 maximum likelihood. *Biometrics*, **53**, 983-997.
- 596 Kramer, M. (2005) *R2 statistics for mixed models*. New Prairie Press, Manhattan, Kansas.
- 597 Kvalseth, T.O. (1985) Cautionary note about R2. *American Statistician*, **39**, 279-285.
- 598 Lavin, S.R., Karasov, W.H., Ives, A.R., Middleton, K.M. & Garland, T., Jr. (2008)  
599 Morphometrics of the avian small intestine, compared with non-flying mammals: a  
600 phylogenetic approach. *Physiological and Biochemical Zoology*, **81**, 526-550.
- 601 Liu, H.H., Zheng, Y. & Shen, J. (2008) Goodness-of-fit measures of R(2) for repeated measures  
602 mixed effect models. *Journal of Applied Statistics*, **35**, 1081-1092.
- 603 Maddala, G.S. (1983) *Limited-dependent and qualitative variables in econometrics*. Cambridge  
604 University Press, Cambridge, UK.
- 605 Magee, L. (1990) R2 measures based on wald and likelihood ratio joint significance tests.  
606 *American Statistician*, **44**, 250-253.
- 607 Martins, E.P. & Hansen, T.F. (1997a) Phylogenies and the comparative method: A general  
608 approach to incorporating phylogenetic information into the analysis of interspecific data.  
609 *American Naturalist*, **149**, 646-667. Erratum 153:448.
- 610 Martins, E.P. & Hansen, T.F. (1997b) Phylogenies and the comparative method: A general  
611 approach to incorporating phylogenetic information into the analysis of interspecific data.  
612 *American Naturalist*, **149**, 646-667.
- 613 McCullagh, P. & Nelder, J.A. (1989) *Generalized linear models*, 2 edn. Chapman and Hall,  
614 London.
- 615 Menard, S. (2000) Coefficients of determination for multiple logistic regression analysis.  
616 *American Statistician*, **54**, 17-24.
- 617 Nagelkerke, N.J.D. (1991) A note on a general definition of the coefficient of determination.  
618 *Biometrika*, **78**, 691-692.
- 619 Nakagawa, S. & Schielzeth, H. (2013) A general and simple method for obtaining R2 from  
620 generalized linear mixed-effects models. *Methods in Ecology and Evolution*, **4**, 133-142.
- 621 Orelie, J.G. & Edwards, L.J. (2008) Fixed-effect variable selection in linear mixed models  
622 using R-2 statistics. *Computational Statistics & Data Analysis*, **52**, 1896-1907.
- 623 Pagel, M. (1997) Inferring evolutionary processes from phylogenies. *Zoologica Scripta*, **26**, 331-  
624 348.

- 625 Paradis, E., Claude, J. & Strimmer, K. (2004) APE: analyses of phylogenetics and evolution in R  
626 language. *Bioinformatics*, **20**, 289-290.
- 627 Paradis, E. & Paradis, E. (2012) *Analysis of Phylogenetics and Evolution with R Introduction*.
- 628 Petersen, K.B. & Pedersen, M.S. (2012) The matrix cookbook. Technical University of Denmark.
- 629 Schall, R. (1991) Estimation in generalized linear models with random effects. *Biometrika*, **78**,  
630 719-727.
- 631 Xu, R.H. (2003) Measuring explained variation in linear mixed effects models. *Statistics in*  
632 *Medicine*, **22**, 3527-3541.
- 633

634 SUPPLEMENTARY MATERIAL

635 Appendix 1: Details about the implementation of the  $R^2$ s.

636 Appendix 2: More comparisons among the  $R^2$ s in the R package rr2.

637 supplementary files: source R scripts for computing  $R^2_{ls}$ ,  $R^2_{lr}$ , and  $R^2_{ce}$  with examples.

638 **Table 1:** Simulation example of sprint speed regressed on log body mass ( $x_1$ ) and log hind limb  
 639 length ( $x_2$ ). For the simulation, the regression coefficients for log(*body size*) and log(*hind leg*  
 640 *length*) were  $\beta_1 = 1$  and  $\beta_2 = 0.5$ , and the intercept was  $\beta_0 = 0$  (equation (8)); residual variation  
 641 was given by BM evolution, so  $\lambda = 1$ . Hind limb length was simulated under BM evolution (left  
 642 table) or as a normal random variable (right table), in both cases with variance 1.  
 643

Phylogenetic signal in  $x_2$

No phylogenetic signal in  $x_2$

| coefficient | estimate | $P$   |
|-------------|----------|-------|
| intercept   | -0.46    | 0.50  |
| $x_1$       | 0.79     | 0.006 |
| $x_2$       | 0.55     | 0.012 |
| $\lambda$   | 1        |       |

| coefficient | estimate | $P$     |
|-------------|----------|---------|
| intercept   | -0.49    | 0.46    |
| $x_1$       | 0.75     | 0.008   |
| $x_2$       | 0.55     | <<0.001 |
| $\lambda$   | 1        |         |

$N = 30$ , logLik = -17.76

$N = 30$ , logLik = -17.12

| reduce model        | $R^2_{ls}$ | $R^2_{ce}$ | $R^2_{lr}$ |
|---------------------|------------|------------|------------|
| $x_2=0$             | 0.21       | 0.23       | 0.21       |
| $\lambda=0$         | 0.69       | 0.89       | 0.72       |
| $x_1=x_2=\lambda=0$ | 0.79       | 0.93       | 0.81       |

| reduced model       | $R^2_{ls}$ | $R^2_{ce}$ | $R^2_{lr}$ |
|---------------------|------------|------------|------------|
| $x_2=0$             | 0.71       | 0.89       | 0.79       |
| $\lambda=0$         | 0.71       | 0.90       | 0.74       |
| $x_1=x_2=\lambda=0$ | 0.88       | 0.96       | 0.90       |

644

645

646 **Table 2.** Illustrative simulation comparing  $R^2$ s for data simulated from a LMM and fitted with  
 647 LMM and PGLS, and for data simulated from a binary GLMM and fitted with GLMM and  
 648 PLOG. Data were simulated from equation (7) with 10 levels of 10 observations each ( $n = 100$ ),  
 649 a random effect with variance 2, a normally distributed  $x$  with mean 0 and variance 1, and for the  
 650 LMM a residual error variance of 0.5. PGLS and PLOG were fit by converting the covariance  
 651 matrix given by the random effects into a phylogeny (Fig. 1). Columns labeled “Mixed” and  
 652 “Phylo” correspond to LMM and GLMM, and PGLS and PLOG, respectively. For the LMM, the  
 653 adjusted  $R^2_{adj}$  was computed from the OLS model fit by treating the random effect as a fixed  
 654 effect with 10 levels.

655

|       |                  | $R^2_{lr}$ |       | $R^2_{ce}$ |       | $R^2_{ls}$ |       | $R^2_{adj}$ |
|-------|------------------|------------|-------|------------|-------|------------|-------|-------------|
|       |                  | Mixed      | Phylo | Mixed      | Phylo | Mixed      | Phylo |             |
| <hr/> |                  |            |       |            |       |            |       |             |
| LMM   |                  |            |       |            |       |            |       |             |
|       | total            | 0.916      | 0.916 | 0.955      | 0.945 | 0.950      | 0.853 | 0.955       |
|       | partial $x$      | 0.722      | 0.722 | 0.764      | 0.763 | 0.764      | 0.490 | 0.764       |
|       | partial $\theta$ | 0.913      | 0.913 | 0.954      | 0.943 | 0.949      | 0.848 | 0.954       |
| GLMM  |                  |            |       |            |       |            |       |             |
|       | total            | 0.317      | 0.317 | 0.471      | 0.468 | 0.591      | 0.550 |             |
|       | partial $x$      | 0.141      | 0.141 | 0.161      | 0.159 | 0.343      | 0.297 |             |
|       | partial $\theta$ | 0.298      | 0.298 | 0.461      | 0.459 | 0.577      | 0.535 |             |

656

657

## Figure legends

658 **Fig. 1.** Depictions of the covariance matrices from PGLS, LMM, PLOG, and GLMM. In the  
659 PGLS with a Pagel's  $\lambda$  branch-length transform, the covariance matrix is  $\Sigma(\lambda) = \lambda \Sigma_{\text{BM}} + (1-\lambda)\mathbf{I}$ ,  
660 in which  $\lambda$  determines the strength of phylogenetic signal in the residual errors. In the covariance  
661 matrix for LMMs,  $\Sigma(\sigma_b^2) = \sigma_b^2 \Sigma_b + \mathbf{I}$ , the variance of the random effect  $\sigma_b^2$  is scaled against the  
662 variance of the residual errors. For PLOG, phylogenetic signal enters the model as a covariance  
663 matrix  $\sigma_w^2 \Sigma_{\text{BM}}$ , but there is additional variance  $\sigma_w^2$  that depends on the difference between  
664 observed and predicted values of  $Y_i$  which varies for each data point. Similarly, for GLMMs the  
665 variance of the random effect is given by  $\Sigma(\sigma_b^2) = \sigma_b^2 \Sigma_b$ , and there is additional variance  $\sigma_w^2$   
666 owing to the discreteness of the data.

667

668 **Fig. 2.** Results for LMM, PGLS, GLMM, and PLOG simulations giving  $R^2_{ls}$ ,  $R^2_{ce}$ ,  $R^2_{lr}$ , and the  
669 OLS  $R^2_{adj}$  versus the log likelihood ratio (LLR) between full model and reduced model  
670 containing only an intercept. All simulated data had 100 samples. For LMM, the simulation  
671 model (equation (7)) contained a fixed effect with  $\beta_1 = 0$  or 1, and a random effect  $u_i$  with 10  
672 levels and variance  $\theta = 0$  or 1.5. The binomial (binary) GLMM was similar but with  $\beta_1 = 0$  or 1.8,  
673 and  $\theta = 0$  or 1.8. For PGLS,  $\beta_1 = 0$  or 1, and the strength of phylogenetic signal  $\theta = \lambda = 0$  or 0.5;  
674 for PLOG  $\beta_1 = 0$  or 1.5, and  $\theta = 0$  or 2. The LMM was fit using lmer (Bates *et al.* 2014); the  
675 GLMM was fit using glmer (Bates *et al.* 2014); the PGLS was fit using phylolm (Ho & Ane  
676 2014); and for PLOG LLR and  $R^2_{lr}$  were fit using phyloglm (Ho & Ane 2014), and  $R^2_{ls}$  and  $R^2_{ce}$   
677 were fit using binaryPGLMM (Ives & Garland 2014). For reduced models without variance  
678 parameters, fitting was done using lm and glm.

679

680 **Fig. 3.** Results for LMM, PGLS, GLMM, and PLOG simulations giving partial values of  $R^2_{ls}$ ,  
681  $R^2_{ce}$ ,  $R^2_{lr}$ , and  $R^2_{adj}$ . The partial  $R^2$  for  $\beta_1$  was calculated using the reduced model in which  $\theta$  is  
682 removed, and for the partial  $R^2$  for  $\theta$  the reduced model had  $\beta_1$  removed. The simulated data and  
683 fitting methods are the same as in figure 1.

684

685 **Fig. 4.** Results for LMM, PGLS, GLMM, and PLOG simulations showing means, 66% and 95%  
686 inclusion intervals for  $R^2_{ls}$ ,  $R^2_{ce}$ ,  $R^2_{lr}$ , and  $R^2_{adj}$  versus sample size. For all simulations 1000 data  
687 sets were analyzed at each sample size. Parameter values were: LMM,  $\beta_1 = 1$ ,  $\theta = 1.5$ ; PGLS,  $\beta_1$   
688  $= 1$ ,  $\theta = 0.5$ ; GLMM,  $\beta_1 = 1.8$ ,  $\theta = 1.8$ ; and PLOG,  $\beta_1 = 1.5$ ,  $\theta = 2$ .

689

690 **Fig. 1**

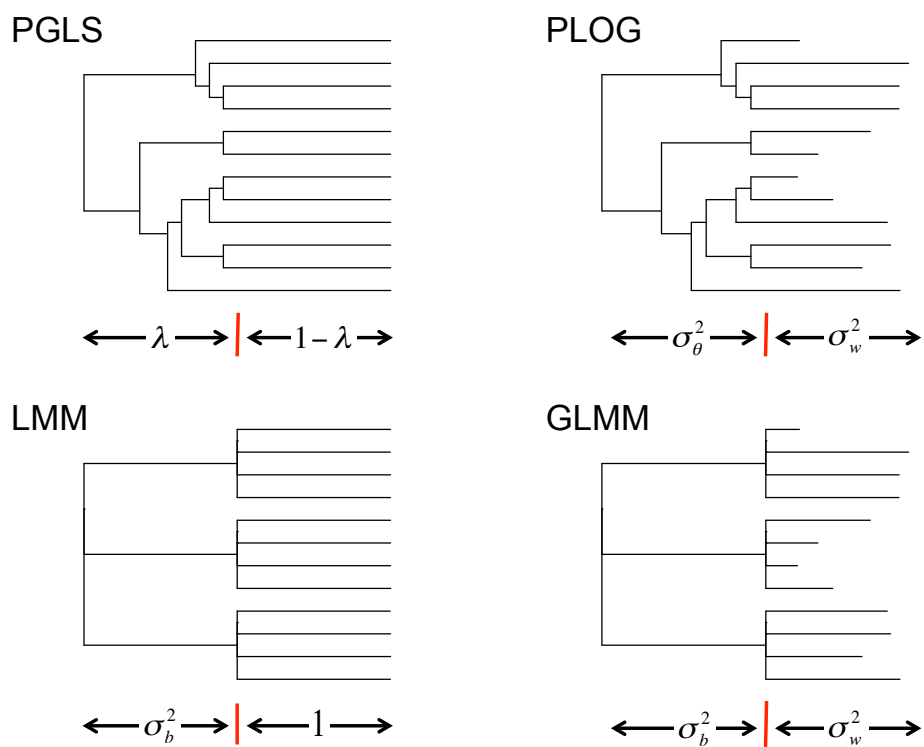

691



692 Fig. 2

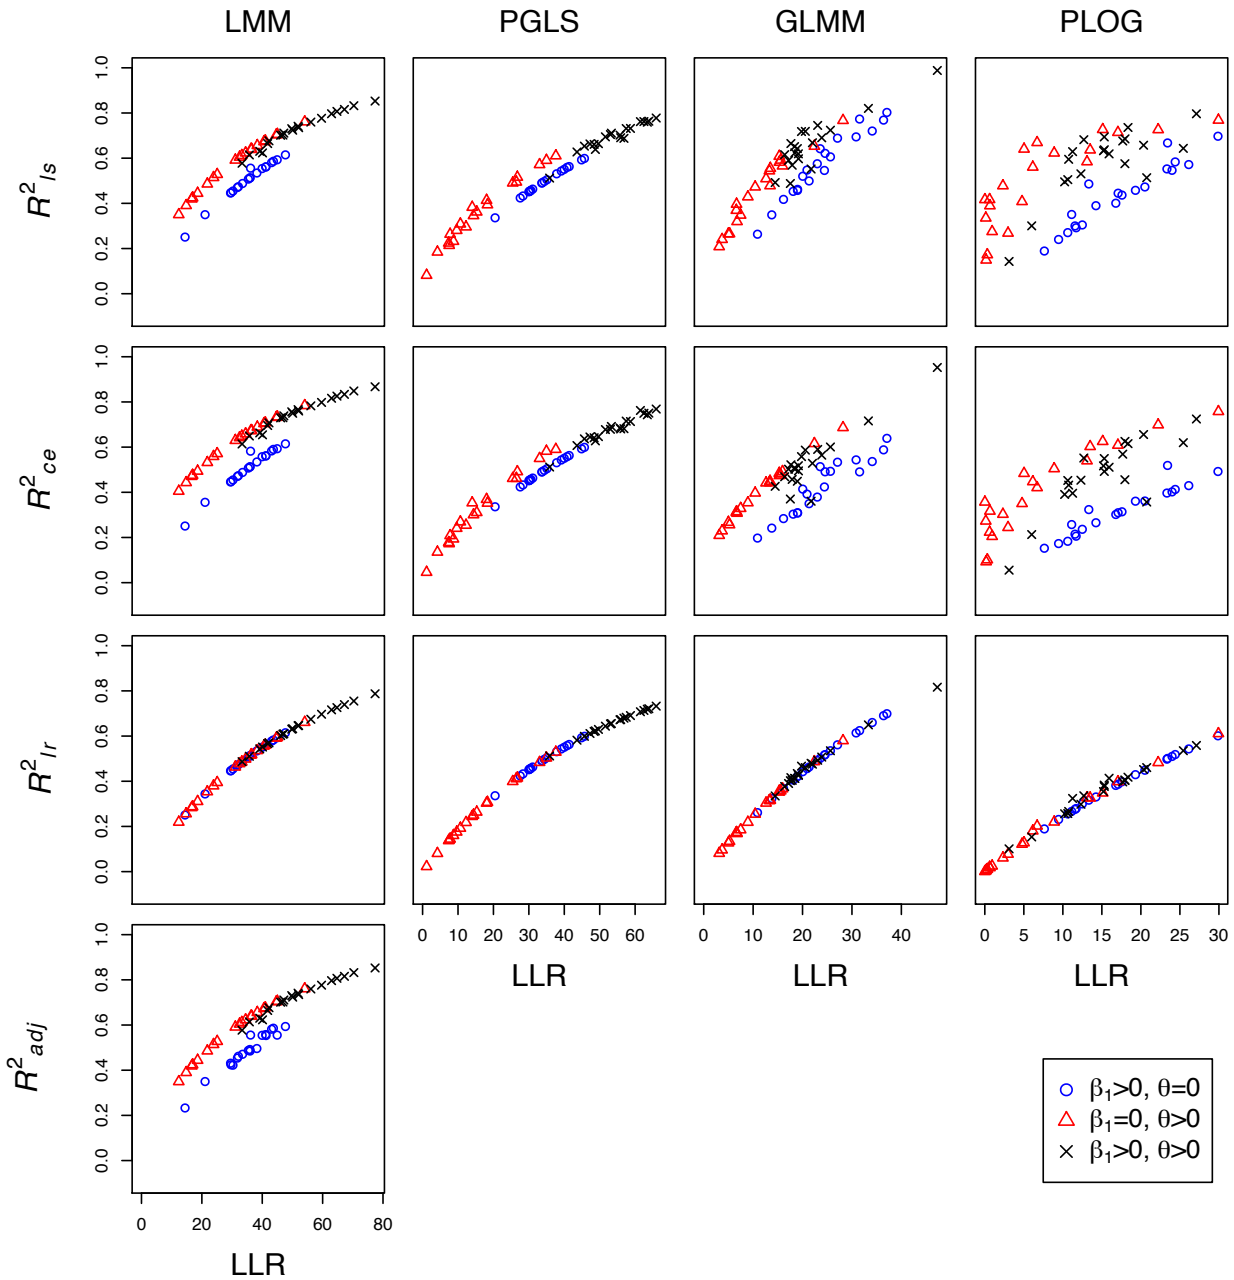

693

694 **Fig. 3**

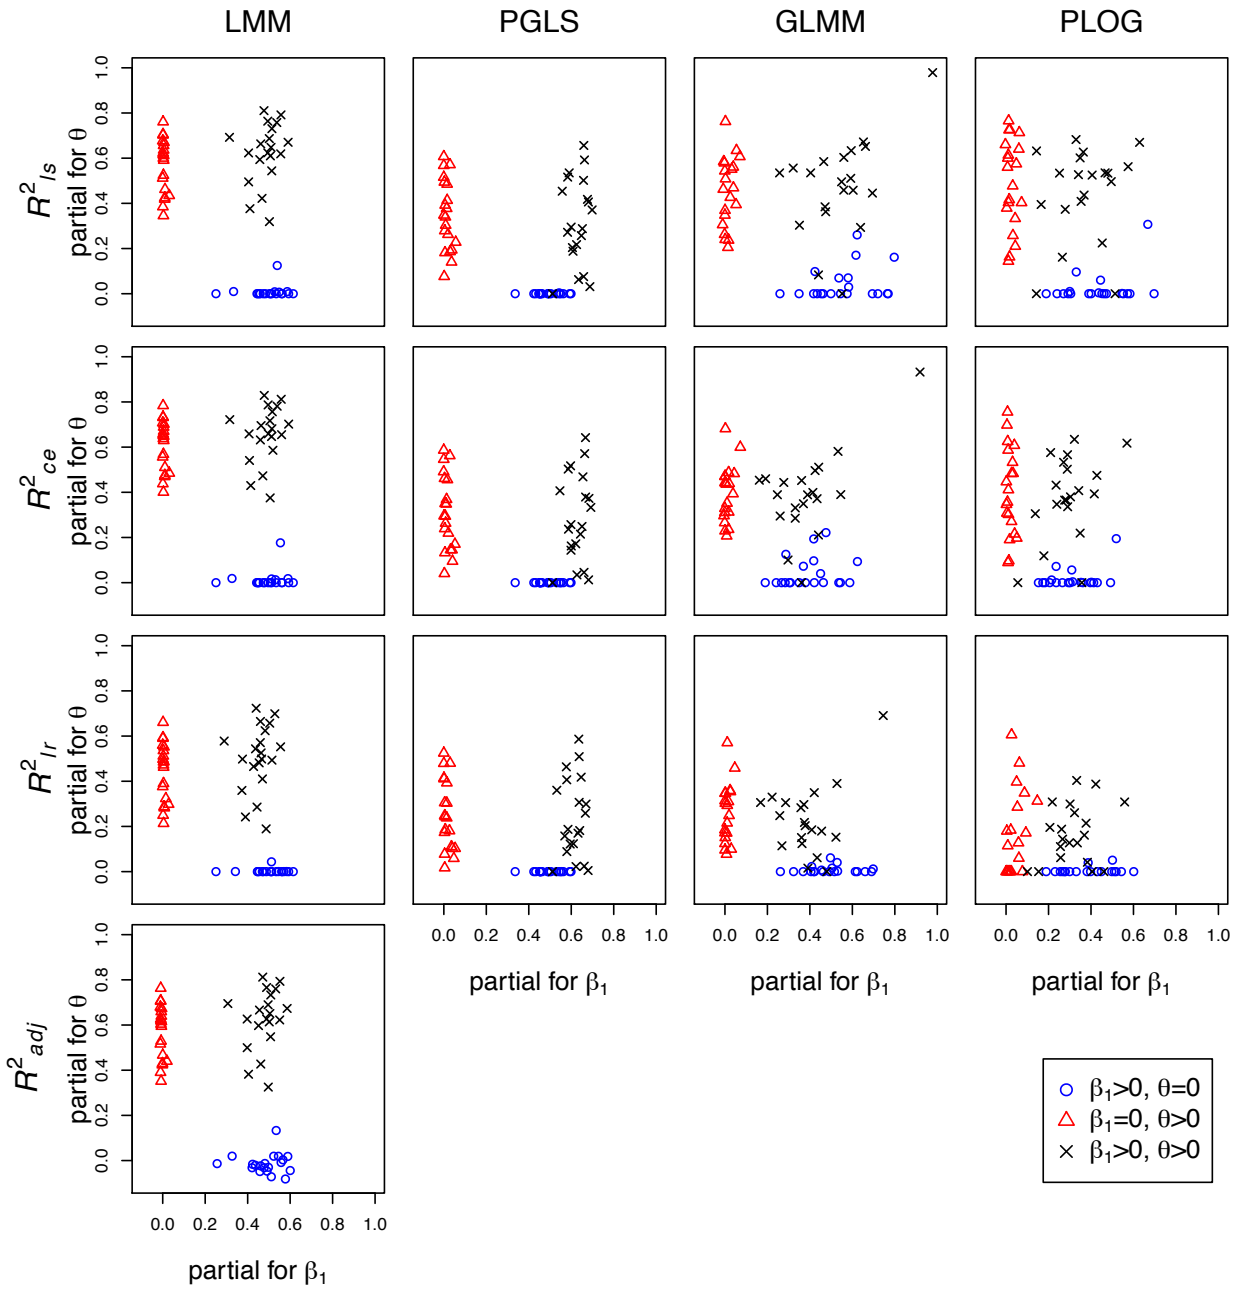

695

696 Fig. 4

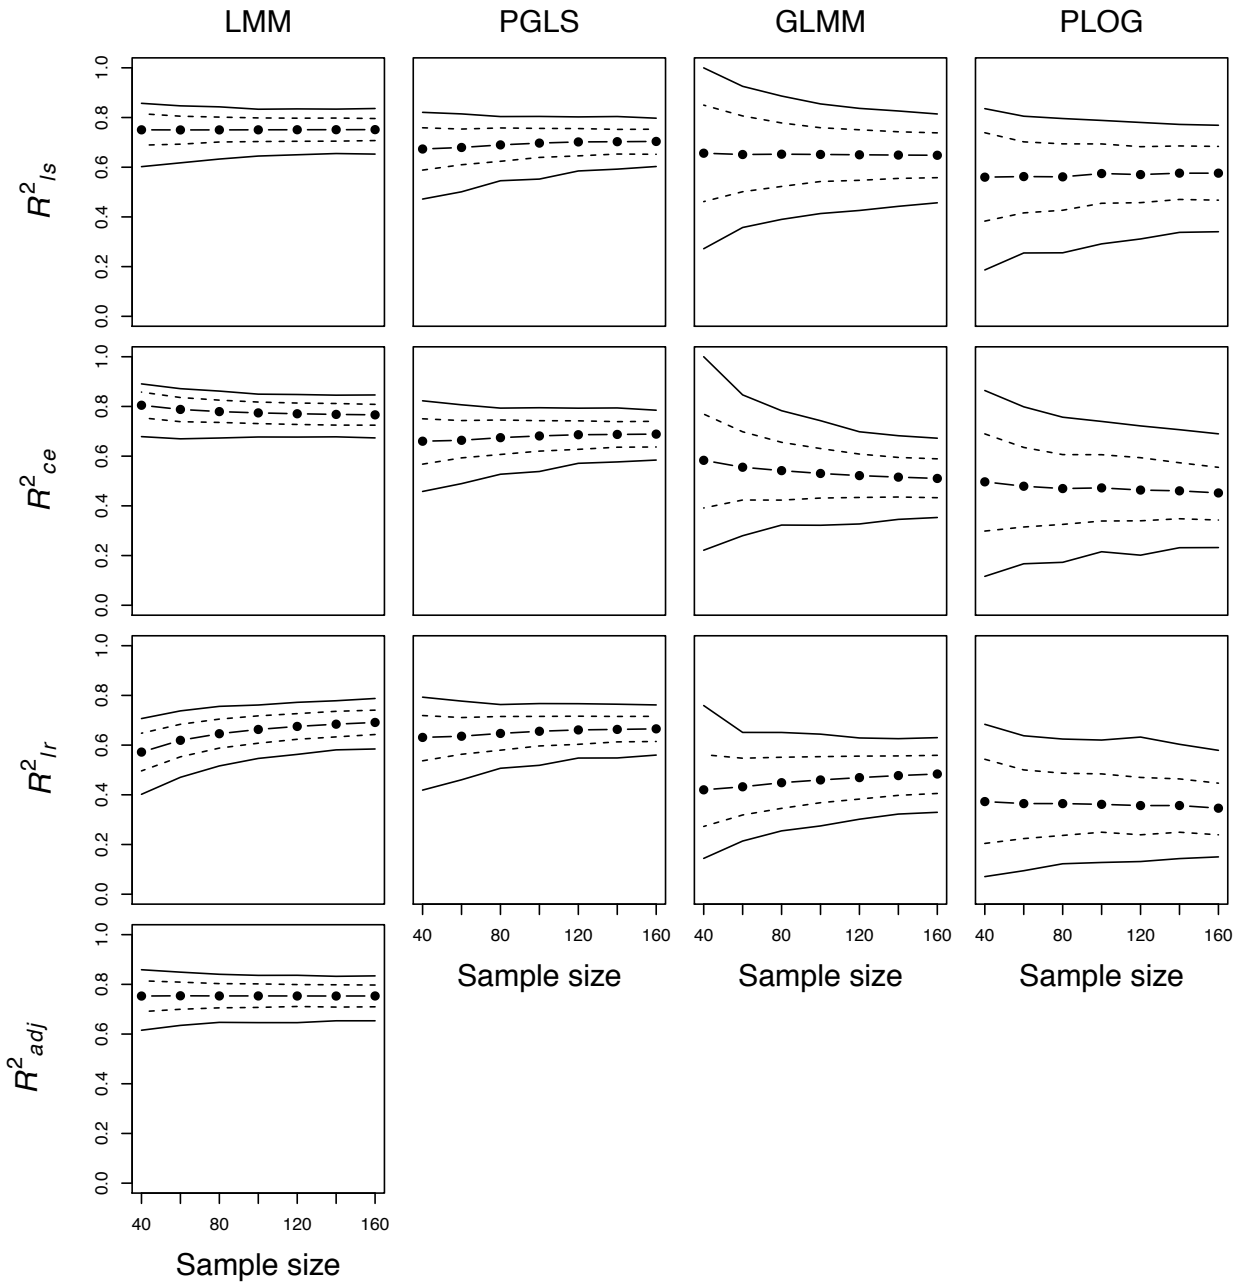

697
